# Supplementary material for: Highly monodisperse low-magnetization magnetite nanocubes as simultaneous T1–T2 MRI contrast agents
Source: Royal Society of Chemistry journal article supplement (doi:10.1039/c5nr00752f), 2015-01-01
Supplement: c5nr00752f1.pdf [file c5nr00752f1.pdf]

# Highly monodisperse low-magnetization magnetite nanocubes as simultaneous T<sub>1</sub>-T<sub>2</sub> MRI contrast agents

*Vijay Kumar Sharma<sup>1,2</sup>, Akbar Alipour<sup>1</sup>, Zeliha Soran-Erdem<sup>1</sup>, Zaliha Gamze Aykut<sup>1</sup> and Hilmi Volkan Demir<sup>1,2\*</sup>*

<sup>1</sup>UNAM-Institute of Materials Science and Nanotechnology, National Magnetic Resonance Research Center (UMRAM), Department of Electrical and Electronics Engineering, Department of Physics, Department of Molecular Biology and Genetics, Bilkent University, Ankara, 06800, Turkey

<sup>2</sup>Luminous! Center of Excellence for Semiconductor Lighting and Displays, School of Electrical and Electronic Engineering, School of Mathematical and Physical Sciences, Nanyang Technological University, Singapore 639798, Singapore

**Corresponding email:** [volkan@bilkent.edu.tr](mailto:volkan@bilkent.edu.tr); [hvdemir@ntu.edu.sg](mailto:hvdemir@ntu.edu.sg)

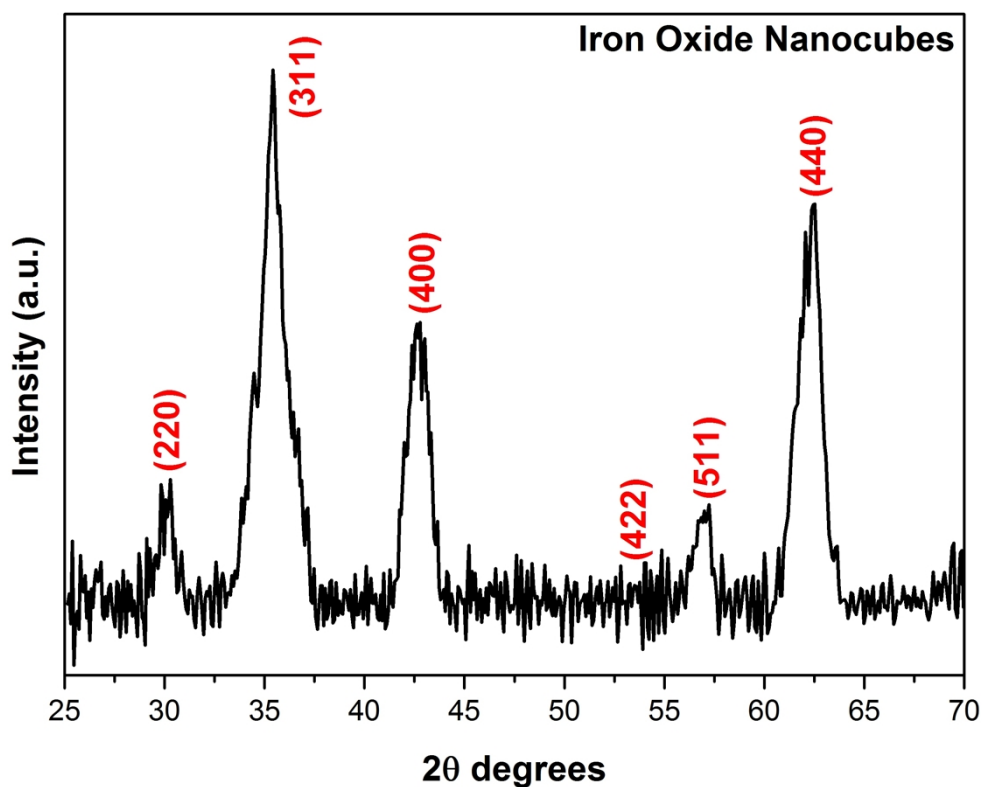

**Fig. S1:** XRD spectra of as-synthesized iron oxide nanocubes.

| (hkl)<br>Planes | Experimental Data<br>d (Å) | JCPDS 19-0629<br>Magnetite<br>Fe <sub>3</sub> O <sub>4</sub><br>d (Å) | JCPDS 39-1346<br>Maghemite<br>Fe <sub>2</sub> O <sub>3</sub><br>d (Å) |
|-----------------|----------------------------|-----------------------------------------------------------------------|-----------------------------------------------------------------------|
| (220)           | 2.96406                    | 2.9670                                                                | 2.9530                                                                |
| (311)           | 2.53165                    | 2.5320                                                                | 2.5177                                                                |
| (400)           | 2.11472                    | 2.0993                                                                | 2.0886                                                                |
| (422)           | 1.71430                    | 1.7146                                                                | 1.7045                                                                |
| (511)           | 1.61598                    | 1.6158                                                                | 1.6073                                                                |
| (440)           | 1.48642                    | 1.4845                                                                | 1.4758                                                                |

**Table S1:** XRD data comparison of the experimental data with the standard magnetite and maghemite JCPDS data.

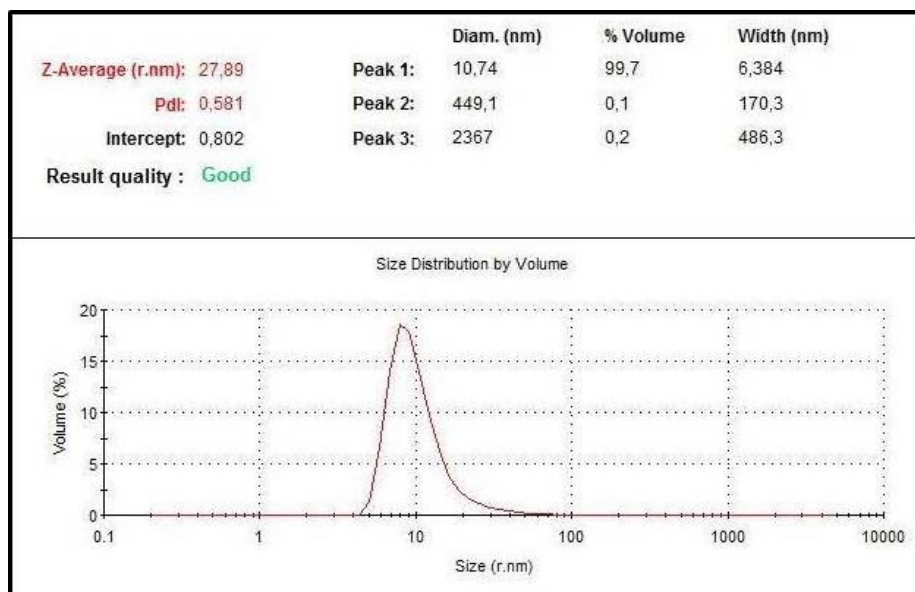

**Fig. S2:** DLS Particle size measurements of the magnetite nanocubes dispersed in water. Z-average (27.8 nm) obtained from DLS is considered as a robust parameter for calculating the size.

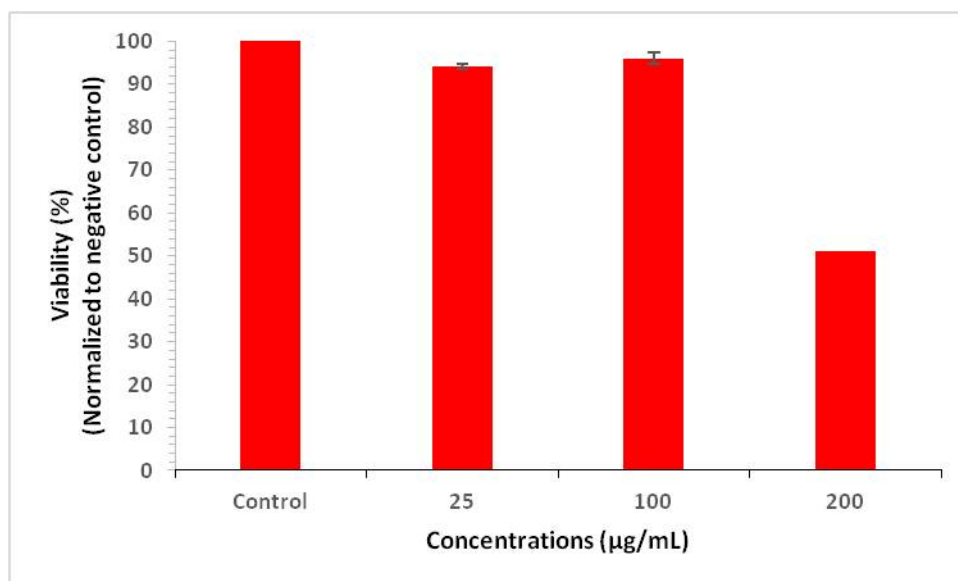

**Fig. S3** Cytotoxicity data for the silica coated iron oxide nanocubes and the control.
